# Supplementary material
Source: publisher figshare collection journal article supplement (https://acs.figshare.com/ndownloader/files/3796090)
Supplement: Supplementary file 1 [file 3796090]

# Solvent induced manipulation of Supramolecular Organic Frameworks

*Rahul S. Patil, Amanda M. Drachnik, Harshita Kumari, Charles L. Barnes, Carol A. Deakyne, Jerry L. Atwood*

## Crystallographic data of frameworks

|                    | <b>1a</b>                                                     | <b>1b</b>                                                     | <b>2a</b>                                                         | <b>2b</b>                                                         |
|--------------------|---------------------------------------------------------------|---------------------------------------------------------------|-------------------------------------------------------------------|-------------------------------------------------------------------|
| Molecular formula  | C <sub>52</sub> H <sub>53</sub> N <sub>4</sub> O <sub>8</sub> | C <sub>56</sub> H <sub>56</sub> N <sub>4</sub> O <sub>8</sub> | C <sub>134</sub> H <sub>153</sub> N <sub>11</sub> O <sub>16</sub> | C <sub>123</sub> H <sub>172</sub> N <sub>10</sub> O <sub>25</sub> |
| Formula weight     | 862.02                                                        | 913.08                                                        | 2173.76                                                           | 2190.78                                                           |
| Crystal system     | Monoclinic                                                    | Orthorhombic                                                  | Triclinic                                                         | Monoclinic                                                        |
| Space group        | P2 <sub>1</sub> /n                                            | Iba1                                                          | P-1                                                               | P2 <sub>1</sub> /n                                                |
| Temp.(K)           | 173                                                           | 100                                                           | 173                                                               | 100                                                               |
| a(Å)               | 11.31                                                         | 27.03                                                         | 14.17                                                             | 17.69                                                             |
| b(Å)               | 14.44                                                         | 18.31                                                         | 16.37                                                             | 20.02                                                             |
| c(Å)               | 27.01                                                         | 19.17                                                         | 26.37                                                             | 34.76                                                             |
| α(°)               | 90                                                            | 90                                                            | 97.48                                                             | 90                                                                |
| β(°)               | 94.70                                                         | 90                                                            | 95.91                                                             | 98.45                                                             |
| γ(°)               | 90                                                            | 90                                                            | 102.92                                                            | 90                                                                |
| V(Å <sup>3</sup> ) | 4401.02                                                       | 9493.32                                                       | 5856.76                                                           | 12186.09                                                          |
| Z                  | 4                                                             | 8                                                             | 2                                                                 | 2                                                                 |

General procedure of growing crystals: In a 20 mL glass vial, 1mL 0.01M solution of R<sub>s</sub>C in acetonitrile or ethanol was mixed with 2mL 0.01 M solution (in same solvent) of bpea molecule. The clear mixture was then sonicated for 5 minutes and allowed to stand for slow solvent evaporation. Crystals suitable for single-crystal X-ray diffraction were obtained over 4-7 days. Similar procedures were followed to grow the crystal for all the frameworks described in the article.
